## RESEARCH ARTICLE

# Physiological control of bioluminescence in a deep-sea planktonic worm, *Tomopteris helgolandica*

Anaïd Gouveneaux\* and Jérôme Mallefet

Marine Biology Laboratory, Earth and Life Institute, Catholic University of Louvain, Place Croix du Sud 3, Louvain-la-Neuve 1348, Belgium

\*Author for correspondence (anaid.gouveneaux@uclouvain.be)

## SUMMARY

*Tomopteris helgolandica* Greeff 1879 (Tomopteridae) is a transparent holoplanktonic polychaete that can emit a bright light. In this study, we investigated the emission pattern and control of this deep-sea worm's luminescence. Potassium chloride depolarisation applied on anaesthetised specimens triggered a maximal yellow light emission from specific parapodial sites, suggesting that a nervous control pathway was involved. Pharmacological screening revealed a sensitivity to carbachol, which was confirmed by a dose–light response associated with a change in the light emission pattern, where physiological carbachol concentrations induced flashes and higher concentrations induced glows. The light response induced by its hydrolysable agonist, acetylcholine, was significantly weaker but was facilitated by eserine pretreatment. In addition, a specific inhibitory effect of tubocurarine was observed on carbachol-induced emission. Lastly, KCl- and carbachol-induced light responses were significantly reduced when preparations were pre-incubated in  $\text{Ca}^{2+}$ -free artificial seawater or in different calcium channel blockers (verapamil, diltiazem) and calmodulin inhibitor (trifluoperazine) solutions. All of these results strongly suggest that *T. helgolandica* produces its light flashes *via* activation of nicotinic cholinergic receptors and a calcium-dependent intracellular mechanism involving L-type calcium channels.

Key words: Tomopteridae, yellow light, annelid, cholinergic control, nervous control, plankton.

Received 8 May 2013; Accepted 12 August 2013

## INTRODUCTION

Planktonic organisms can achieve almost perfect invisibility *via* transparency, making this one of the most valuable and fascinating adaptations to pelagic environments (Johnsen and Widder, 1998). Paradoxically, at first sight, some of these cryptic organisms are also brightly luminous (Haddock and Case, 1999; Poupin et al., 1999).

The tomopterid holoplanktonic polychaetes belong to a particularly diverse family that is extremely transparent (Johnsen and Widder, 1998) and includes at least 11 bioluminescent species (Poupin et al., 1999). Although the spectral distribution has been measured in only two species ( $\lambda_{\text{max}}=565$  nm for *Tomopteris nisseni* and  $\lambda_{\text{max}}=570$  nm for *T. septentrionalis*) (Dales, 1971; Latz et al., 1988), these pelagic worms are often described as yellow emitters, in contrast to most bioluminescent marine organisms, which emit a blue–green light. Additionally, given the species-specific luminous organ distribution observed in this family, this unusual luminescence has been suggested to be an intraspecific communication signal (Harvey, 1952; Dales, 1971; Latz et al., 1988). Since the review of Dales (Dales, 1971), this elegant hypothesis is often highlighted despite the lack of evidence, given basic experimental data are missing such as emission pattern and associated physiological control mechanisms. Here, we focused on these fundamental aspects and present a pharmacological approach to investigating the luminescence control of *T. helgolandica* Greeff 1879, a widespread, previously established bioluminescent East Atlantic species (Harvey, 1952).

## MATERIALS AND METHODS

### Organism collection

*Tomopteris helgolandica* specimens (1.5–6.0 cm in length), were collected from October 2010 to November 2012 at a 200–300 m depth from two connected fjords, Raunefjorden and Korsfjorden (Western Norway), using two types of towed net samplers: the Isaacs–Kidd midwater trawl (1.75 m wide×1.30 m high mouth, 6.5 m long, 500 µm mesh aperture) or ring plankton nets (1.5 m diameter mouth, 300 µm mesh aperture) depending on the weather and the vessel's equipment. Live specimens were housed in classical aquariums or in Kreisel tanks commonly used for maintaining gelatinous zooplankton (Baker, 1963; Raskoff et al., 2003) in a permanent dark cold room (6–8°C) at the Espérend Marine Biological Station of the University of Bergen, Norway.

### Anaesthesia

Several anaesthetics that have previously been used on polychaetes (Smaldon and Lee, 1979; Costa-Paiva et al., 2007; Ross and Ross, 2008; Cooper, 2011), including magnesium chloride, propylene phenoxetol and tricaine mesylate, were unsuccessful with *T. helgolandica*. However, preliminary experiments demonstrated that menthol efficiently anaesthetised the animals within 30 min and reduced the interindividual variability of the emitted light compared with non-treated specimens without affecting light emission parameters. Thus, before each experiment, the organisms were relaxed for 30 min in a menthol solution applied at increasing concentrations (0.25–2.5 g l<sup>-1</sup>).

Table 1. Detailed list of chemical and pharmacological substances used in experiments aimed at assessing the nervous control of luminescence in *Tomopteris helgolandica*

| Drug            |                                           | Pharmacology                                  | Concentration (mmol l <sup>-1</sup> ) |
|-----------------|-------------------------------------------|-----------------------------------------------|---------------------------------------|
| Usual name      | Commercial name                           |                                               |                                       |
| KCl             | Potassium chloride                        | Depolarizing agent                            | 200                                   |
| Serotonin       | 5-Hydroxytryptamine                       | Serotonergic neurotransmitter                 | 1                                     |
| Adrenaline      | (±)-Adrenaline                            | Adrenergic neurotransmitter                   | 1                                     |
| GABA            | γ-Aminobutyric acid                       | GABAergic neurotransmitter and neuromodulator | 1                                     |
| Nitric oxide    | Sodium nitroprusside                      | Guanylyl cyclase activator                    | 1                                     |
| Carbachol       | Carbamoylcholine chloride                 | Cholinergic agonist                           | 1                                     |
| DMPP            | 1,1-dimethyl-4-phenyl-piperazinium iodide | Nicotinic agonist                             | 1                                     |
| Acetylcholine   | Acetylcholine chloride                    | Cholinergic neurotransmitter                  | 1                                     |
| Eserine         | Eserine                                   | Cholinesterase inhibitor                      | 1                                     |
| Tubocurarine    | d-Tubocurarine chloride                   | Cholinergic nicotinic receptor antagonist     | 1                                     |
| Atropine        | Atropine sulphate                         | Cholinergic muscarinic receptor antagonist    | 1                                     |
| Nifedipine      | Nifedipine                                | Calcium channel blocker                       | 1                                     |
| Diltiazem       | Diltiazem chloride                        | Calcium channel blocker                       | 1                                     |
| Trifluoperazine | Trifluoperazine dihydrochloride           | Calmodulin inhibitor                          | 1                                     |
| Verapamil       | (±)-Verapamil                             | Calcium channel blocker                       | 1                                     |

Pharmacology

The organisms were dissected from the head to the tail into serial preparations that comprised three parapod pairs. Each preparation was placed into 50 µl of artificial seawater (ASW: 400.4 mmol l<sup>-1</sup> NaCl, 9.6 mmol l<sup>-1</sup> KCl, 52.3 mmol l<sup>-1</sup> MgCl<sub>2</sub>, 9.9 mmol l<sup>-1</sup> CaCl<sub>2</sub>, 27.7 mmol l<sup>-1</sup> Na<sub>2</sub>SO<sub>4</sub>, 20 mmol l<sup>-1</sup> Tris, final pH 8.3). Next, light production was triggered by adding 50 µl of a given test solution. For each studied specimen, one preparation was treated with the control stimulus (200 mmol l<sup>-1</sup> KCl or, depending on the tested effect and based on preliminary results, 1 mmol l<sup>-1</sup> cholinergic agonist) whereas the other preparations were treated with different pharmacological substances (Table 1). The light responses were standardised and expressed as a percentage of the control light response. All of the experiments were designed following the Latin square principle: from one specimen to another, the preparation from an identical position is never treated twice by the same solution to eliminate possible interindividual or interpreparation variability. The pharmacological solutions were prepared in ASW buffered at pH 8.3 just before the experiments were performed. The light intensity was measured for 10–20 min with a single tube luminometer (FB12, 2005, Berthold Technologies, Bad Wildbad, Germany). To avoid light stress or artefactual measurements, all handling and experiments were performed in partial darkness or under red lighting.

Statistics

All of the statistical analyses were performed with JMP software (v10.0.0, 2012, SAS Institute Inc., Cary, NC, USA) on log-transformed data [ $\sum \log(x_{i \rightarrow n})/n$ ] for relative values >1. Variance normality and equality were first tested by the Shapiro–Wilk test and Levene’s test, respectively. When these parametric assumptions were not met, a one-way ANOVA was replaced by a non-parametric Kruskal–Wallis ANOVA to assess the significant difference between more than two groups. All of the pairwise comparisons were tested using a *post hoc* Student’s *t*-test (each pair), Dunnett’s test (with control) or a *post hoc* Dunn’s test, as appropriate. Each difference was considered to be significant at 0.05. For clarity, the graphically illustrated values are expressed as the geometric means [ $\sqrt[n]{x_1 \times x_2 \times \dots \times x_n}$ ] with the corresponding s.e.m.

RESULTS

Light emission pattern

When applied on whole specimens, potassium chloride (200 mmol l<sup>-1</sup> KCl) triggered a maximal yellow light emission at

specific parapodial sites and locally reached 10<sup>3</sup> Mquanta s<sup>-1</sup> (where 1 megaquanta=10<sup>6</sup> photons) (Fig. 1A,C). Because of the linear relationship between the total emitted light (*L*<sub>tot</sub>) and the maximal light intensity (*L*<sub>max</sub>) of the control light responses (Fig. 1B), only *L*<sub>tot</sub> is presented.

Screening of neurotransmitters

The primary neurotransmitter families known to mediate bioluminescence throughout invertebrates were pharmacologically screened on *T. helgolandica* parapods (Nicol, 1960; Case and Strause, 1978; Anctil, 1979; Gardner and Walker, 1982; Anctil, 1987; Walker et al., 1996) (Table 2). Only carbachol elicited a luminescence higher than the ASW-induced emission (mechanical stimulus).

Extrinsic cholinergic control

The amount of emitted light increased with increasing carbachol concentration (Fig. 2A), and different emission patterns were observed at various concentrations. At low carbachol concentrations, the pattern consisted of a series of weak intensity flashes (Fig. 2A, top left panel), which was in contrast to the monophasic shape of 1 mmol l<sup>-1</sup> carbachol light emission (Fig. 2A, top right panel), which was similar to the KCl-induced light response (Fig. 1A). However, the tissue preparations generally responded poorly to acetylcholine compared with its non-hydrolysable agonist carbachol. Thus, an eserine pre-treatment was tested. This cholinesterase inhibitor induced a weak light response (0.04±0.03% of KCl) and significantly facilitated acetylcholine-induced emission but did not affect carbachol-induced light emission (Fig. 2B). Lastly, the specificity of the cholinergic receptors was evaluated using nicotinic and muscarinic blocking agents, tubocurarine and atropine, respectively (Table 1). Only tubocurarine significantly inhibited the carbachol-induced emission (Fig. 2C). This observation was confirmed with the nicotinic agonist dimethylphenylpiperazinium (DMPP), which triggered an intense light emission (9519.55±8490.38% of KCl; not shown).

Intrinsic control: calcium requirement

Given that the nicotinic control pathway suggests that Ca<sup>2+</sup> is a second messenger, we aimed to investigate the calcium dependence of the reaction. Pre-incubating the tissue preparations in Ca<sup>2+</sup>-free ASW significantly inhibited the KCl- and carbachol-induced luminescence responses by 95 and 100%, respectively (Fig. 3A).

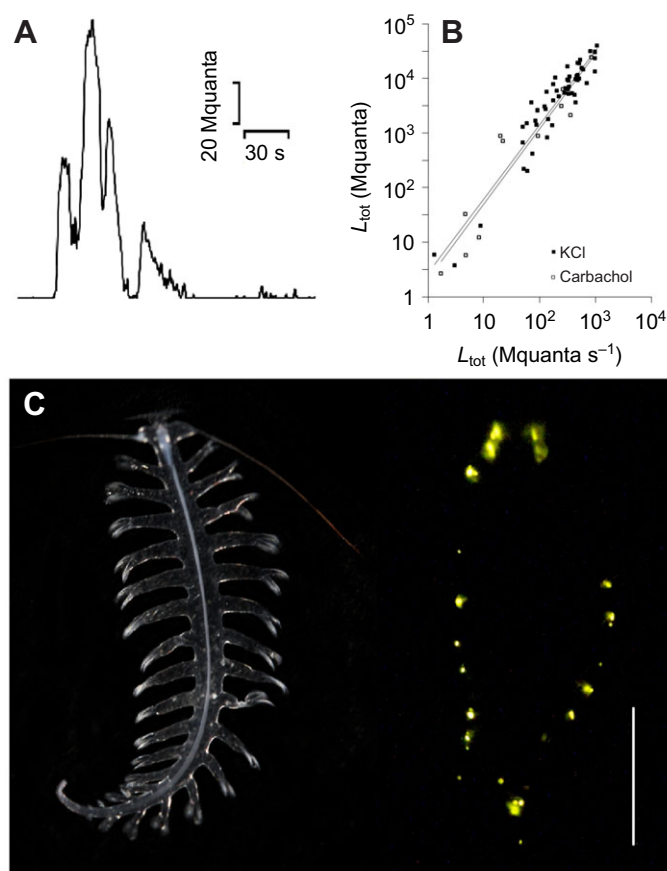

Fig. 1. Light emission pattern of *Tomopteris helgolandica*. (A) Typical curve shape of maximal KCl-induced light emission. (B) Linear relationship between the total quantity of light emitted ( $L_{\text{tot}}$ ) and the maximal light intensity ( $L_{\text{max}}$ ) for 200 mmol l<sup>-1</sup> KCl- and 1 mmol l<sup>-1</sup> carbachol-induced luminescence. 1 megaquanta=10<sup>6</sup> photons.  $R^2$ -values are 0.8944 and 0.8822, respectively, and the slopes ( $P=0.6921$ ) and intercepts ( $P=0.6609$ ) are significantly equal. (C) *Tomopteris helgolandica* was photographed in natural light and its KCl-induced bioluminescence was photographed in the dark. Scale bar, 1 cm.

The luminescence was also significantly reduced by different calcium channel blockers, verapamil (phenylalkylamines) and diltiazem (benzothiazepine), and by trifluoperazine, a calmodulin inhibitor (Fig. 3B).

### DISCUSSION

Although some bioluminescent organisms produce a continuous glow, most light emission signals are transient events mediated by specific control mechanisms (Nicol, 1960). Two control levels are commonly distinguished: an extrinsic control represented by peripheral control pathways and an intrinsic control that includes the photogenic reaction and the related intracellular signalling pathways (Case and Strause, 1978). In self-luminescent metazoans characterised by differentiated photogenic structures, emission is controlled either by hormones (Claes and Mallefet, 2009) or *via* coupling mechanisms between photocytes and excitable cells, including neural, muscular or epithelial cells (Herring and Morin, 1978; Anctil, 1987; Hastings and Morin, 1991; Krönström et al., 2009). Although luminescence can originate in a nerve-free bioluminescent epithelium, such as in the conducting epithelia of some Hydrozoa (Bassot et al., 1978; Dunlap et al., 1987) and Anthozoa (Germain and Anctil, 1996), it is most frequently

Table 2. Screening of neurotransmitter effects on isolated tissue preparations of *T. helgolandica*

| Drug          | $L_{\text{tot}}$<br>(% KCl) | $P$ -value | $N$ |
|---------------|-----------------------------|------------|-----|
| ASW (control) | 4.67±4.22                   |            | 5   |
| Serotonin     | 16.56±15.13                 | 1.000      | 5   |
| Adrenaline    | 53.71±52.76                 | 1.000      | 5   |
| GABA          | 15.76±10.60                 | 1.000      | 5   |
| Nitric oxide  | 89.40±79.55                 | 1.000      | 4   |
| Carbachol     | 1129.88±482.90              | 0.2839     | 5   |

Light intensity ( $L_{\text{tot}}$ ) is expressed as a function of KCl-induced luminescence. ASW, artificial sea water.

controlled by neural pathways (Nicol, 1960; Case and Strause, 1978). In addition to turning the light emission on and off, nervous control abilities can modulate and adjust the intensity, duration, frequency or angular distribution of a light signal and thus generate diversity and specificity. However, a large proportion of the functional diversity of the existing emission patterns and control systems is unknown, especially in annelids, where the most detailed bioluminescence control studies have been limited to polynoid and chaetopterid benthic species (Gardner and Walker, 1982; Anctil, 1987). Therefore, the luminescence control of pelagic worm species has been poorly documented (Harvey, 1952; Haddock et al., 2010).

According to our results, *T. helgolandica* luminescence is under nervous control, as revealed by yellow luminescence induced by KCl depolarisation in nervous fibres, which directly or indirectly causes a photogenic structure response (De Bremaeker et al., 1996). Furthermore, the pharmacological screen revealed a dose-dependent carbachol sensitivity. In fact, carbachol and acetylcholine both induced light emission, but the tissue preparations demonstrated a low responsiveness to acetylcholine. Pharmacological carbachol concentrations (over 0.1 mmol l<sup>-1</sup>) elicited a monophasic signal, similar to KCl-induced light emission, but 1 mmol l<sup>-1</sup> acetylcholine failed to elicit such a pattern. However, eserine pre-treatment significantly facilitated acetylcholine-induced light emission, which attained similar intensities to those emitted in response to low carbachol concentrations (<0.1 mmol l<sup>-1</sup>, nearest physiological concentration) and suggested an involvement of cholinesterase activity. Lastly, the flash trains ( $L_{\text{max}}=400$  Mquanta s<sup>-1</sup>) observed at the lowest concentrations were probably more representative of the naturally expressed signal. The specific inhibitory effect of tubocurarine on carbachol-induced emission not only indicates an involvement of the cholinergic pathway but also demonstrates the nicotinic receptor prevalence. These observations were supported by the sensitivity of the samples to the nicotinic agonist DMPP and by their calcium-dependent light response, which suggested that L-type calcium channels were also involved. *Tomopteris helgolandica* produces yellow flashes from each parapod through neural control that activates nicotinic cholinergic receptors and a calcium-dependent intrinsic mechanism.

Numerous and widespread cholinergic control mechanisms exist in annelids (Gardner and Walker, 1982; Walker et al., 1996). The control of bioluminescence is relatively well known in Polynoidae and Chaetopteridae (Nicolas et al., 1978; Gardner and Walker, 1982; Anctil, 1987) and is reinforced by the present study of one Tomopteridae. However, because of its ubiquity, the specific mode, level and site of action of acetylcholine in the bioluminescent process remain unclear. Muscarinic cholinergic and serotonergic mechanisms have been described in benthic scale-worms (Polynoidae) as part of the excitatory pathway of elytral

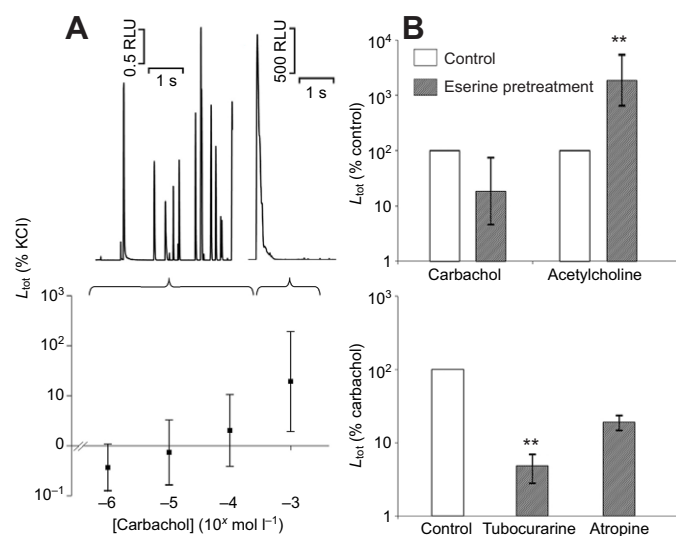

Fig. 2. Physiological control of bioluminescence in *T. helgolandica*. (A) Bottom, carbachol dose-light response. The total quantity of light emitted during the experiment ( $L_{\text{tot}}$ ) is expressed as a percentage of the value obtained with KCl application (theoretical physiological maximum). Top, parapod luminescent response patterns to low (left) and high (right) carbachol concentrations. RLU, relative light units. (B) Effect of eserine pre-treatment on the luminescence induced by carbachol and acetylcholine. The values represent the  $L_{\text{tot}}$  increase expressed as a percentage of each activator injected alone (without eserine pre-treatment). Eserine significantly increased the luminescent response to acetylcholine but did not affect carbachol-induced luminescence. (C) The effect of atropine and tubocurarine pre-treatment on carbachol-induced luminescence. Tubocurarine significantly decreased the luminescent response to carbachol, but atropine did not significantly affect this luminescence.  $N=6$  (\*\* $P<0.01$ ).

luminescence (Nicol, 1954; Nicolas et al., 1978; Miron et al., 1987; Anctil et al., 1989). The tube-worm *Chaetopterus variopedatus* (Chaetopteridae) produces a glowing blue mucus in response to the contractile action of the adjacent epithelio-muscular cells, which are controlled by muscarinic cholinergic and GABAergic pathways (Nicol, 1952; Anctil, 1981; Martin and Anctil, 1984; Anctil, 1987). Given that some photocytes in other organisms are not directly innervated but are controlled by adjacent supportive cells that trigger light emission by epithelial conduction (Anctil, 1987; Dunlap et al., 1987), the calcium entry via L-type channels we observed could act at both the neuro-photocyte level and an intermediate level. The presence of parapod nerve fibres, revealed by the histological studies of Greeff (Greeff, 1882; Greeff, 1885) and Bonhomme (Bonhomme, 1952) on *T. mariana* and *T. kefersteini*, respectively, suggested that the bioluminescence of these worms was under nervous control. In particular, Greeff exhibited a scheme of photogenic organs with direct nerve connections. However, the characterisation of photogenic structures remains ambiguous (Malaquin and Carin, 1922; Bonhomme, 1952).

Despite the differences observed in the light emission pattern, its control and the bioluminescence characteristics between polynoid and chaetopterid worms, the luminescence in all cases has been associated with defensive functions. The same hypothesis has been suggested for the blue luminescence of the benthic polychaete *Polycirrus perplexus* (Terebellidae) (Huber et al., 1989) and for the 'green bombs' expelled by the recently described deep-sea pelagic specimens belonging to Acrocirridae (Osborn et al., 2011). Only syllid worms, whose behaviour has been well studied, use their green light emission

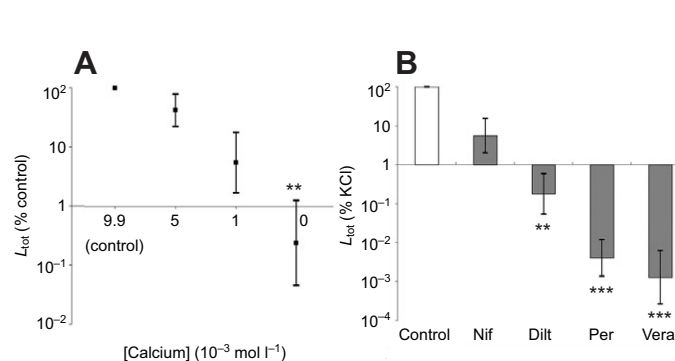

Fig. 3. Intrinsic control of bioluminescence in *T. helgolandica*. (A) Dose-dependent inhibitory effect of calcium depletion. The values represent the  $L_{\text{tot}}$  decrease expressed as a percentage of that obtained in complete artificial seawater ( $10 \text{ mmol l}^{-1}$ ). (B) The effect of calcium organic inhibitors (Nif, nifedipine; Dilt, diltiazem; Per, trifluoperazine; Vera, verapamil) on KCl-induced luminescence.  $N=6$  (\* $P<0.05$ , \*\* $P<0.01$ , \*\*\* $P<0.001$ ).

for both deterrence and intraspecific communication during mating swarms (Wilkins and Wolken, 1981; Tsuji and Hill, 1983; Fischer and Fischer, 1995; Gaston and Hall, 2000; Deheyn and Latz, 2009). Given that the open ocean does not facilitate contact between planktonic organisms, an atypical emission wavelength would be highly advantageous for Tomopteridae. Although the emission of yellow light has been interpreted by numerous authors as a specific signal that involves a private communication channel (Harvey, 1952; Dales, 1971; Latz et al., 1988), the maximal wavelength of *T. septentrionalis* ( $\lambda_{\text{max}}=570 \text{ nm}$ ) does not match its spectral sensitivity, which is centred on blue (Buskey and Swift, 1985).

Nevertheless, it is likely that *T. helgolandica*'s yellow light may play different roles, as suggested by the observation of different emission patterns – flash *versus* glow – according to the stimulus applied. Flash is often associated with a deterrent function, whereas glows are considered attractive, suggesting that the worms modulate the light output depending on the context that incites the use of bioluminescence. However, in the absence of further experimental data, this hypothesis remains speculative.

### Conclusions

Our results strongly support the hypothesis that *T. helgolandica*'s bioluminescence is under nervous control, revealing new insight into the pathways involved. The yellow light flashes are produced via activation of nicotinic cholinergic receptors and a calcium-dependent intracellular mechanism involving L-type calcium channels.

However, the understanding of tomopterid bioluminescence at an ecological level is beyond our current knowledge. In addition to studying the intrinsic mechanisms of light emission, an assessment of the mechanisms that govern their visual capabilities as well as their reproductive biology and behaviour will be performed in our future research.

### ACKNOWLEDGEMENTS

We thank the Espérend Marine Biological Station of the University of Bergen and the Technological Platform of Statistical Methodology and Computing Support of the Catholic University of Louvain.

### AUTHOR CONTRIBUTIONS

A.G. and J.M. designed the experiments, and collected the samples and data. A.G. performed the experiments and analysis, and wrote the manuscript. J.M. revised the manuscript.



## COMPETING INTERESTS

No competing interests declared.

## FUNDING

This research was supported by a Research Foundation for Industry and Agriculture (FRIA) research grant (to A.G.) and a Fonds de la Recherche Fondamentale Collective (FRFC) grant 2.4525.12, Fonds de la Recherche Scientifique (FNRS), Belgium. J.M. is an FNRS research associate. This is a contribution to the Biodiversity Research Centre of the Earth and Life Institute (UCL) and to the CIBIM.

## REFERENCES

- Anctil, M. (1979). Physiological control of bioluminescence. *Photochem. Photobiol.* **30**, 777-780.
- Anctil, M. (1981). Luminescence control in isolated notopods of the tube-worm *Chaetopterus variopedatus*: effects of cholinergic and GABAergic drugs. *Comp. Biochem. Physiol.* **68C**, 187-194.
- Anctil, M. (1987). Neural control mechanisms in bioluminescence. In *Nervous Systems in Invertebrates* (ed. M. A. Ali), pp. 573-602. New York, NY: Plenum Press.
- Anctil, M., Bassot, J.-M. and Nicolas, M.-t. (1989). Effects of monoamines and related drugs on the bioluminescence of scale-worm elytra (Polychaeta, Polynoidae). *Comp. Biochem. Physiol.* **93C**, 127-135.
- Baker, A. C. (1963). The problem of keeping planktonic animals alive in the laboratory. *J. Mar. Biol. Assoc. UK* **43**, 291-294.
- Bassot, J.-M., Bilbaut, A., Mackie, G., Passano, L. and De Ceccatty, M. P. (1978). Bioluminescence and other responses spread by epithelial conduction in the siphonophore *Hippopodius*. *Biol. Bull.* **155**, 473-498.
- Bonhomme, C. (1952). La Bioluminescence de quelques annélides méditerranéennes. (Etude histologique et histophysiologique). *Naturalia Monspeliensa* **2**, 7-137.
- Buskey, E. J. and Swift, E. (1985). Behavioral responses of oceanic zooplankton to simulated bioluminescence. *Biol. Bull.* **168**, 263-275.
- Case, J. F. and Strause, L. G. (1978). Neurally controlled luminescent systems. In *Bioluminescence in Action* (ed. P. J. Herring), pp. 331-366. London; New York, NY; San Francisco, CA: Academic Press.
- Claes, J. M. and Mallefet, J. (2009). Hormonal control of luminescence from lantern shark (*Etmopterus spinax*) photophores. *J. Exp. Biol.* **212**, 3684-3692.
- Cooper, J. E. (2011). Anesthesia, analgesia, and euthanasia of invertebrates. *ILAR J.* **52**, 196-204.
- Costa-Paiva, E. M., Paiva, P. C. and Klautau, M. (2007). Anaesthetization and fixation effects on the morphology of sabellid polychaetes (Annelida: Polychaeta: Sabellidae). *J. Mar. Biol. Assoc. UK* **87**, 1127-1132.
- Dales, R. P. (1971). Bioluminescence in pelagic polychaetes. *J. Fish. Res. Board Can.* **28**, 1487-1489.
- De Bremaeker, N., Mallefet, J. and Baguet, F. (1996). Luminescence control in the brittlestar *Amphipholis squamata*: effect of cholinergic drugs. *Comp. Biochem. Physiol.* **115C**, 75-82.
- Deheyn, D. D. and Latz, M. I. (2009). Internal and secreted bioluminescence of the marine polychaete *Odontosyllis phosphorea* (Syllidae). *Invertebr. Biol.* **128**, 31-45.
- Dunlap, K., Takeda, K. and Brehm, P. (1987). Activation of a calcium-dependent photoprotein by chemical signalling through gap junctions. *Nature* **325**, 60-62.
- Fischer, A. and Fischer, U. (1995). On the life-style and life-cycle of the luminescent polychaete *Odontosyllis enopla* (Annelida: Polychaeta). *Invertebr. Biol.* **114**, 236-247.
- Gardner, C. R. and Walker, R. J. (1982). The roles of putative neurotransmitters and neuromodulators in annelids and related invertebrates. *Prog. Neurobiol.* **18**, 81-120.
- Gaston, G. R. and Hall, J. (2000). Lunar periodicity and bioluminescence of swarming *Odontosyllis luminosa* (Polychaeta: Syllidae) in Belize. *Gulf Car. Res.* **12**, 47-51. (Formerly Gulf Research Reports).
- Germain, G. and Anctil, M. (1996). Evidence for intercellular coupling and connexin-like protein in the luminescent endoderm of *Renilla koellikeri* (Cnidaria, Anthozoa). *Biol. Bull.* **191**, 353-366.
- Greiff, R. (1882). Ueber die rosettenförmigen leuchtorgane der tomopteriden und zwei neue arten von tomopteris. *Zool. Anz.* **5**, 384-387.
- Greiff, R. (1885). Ueber die pelagische fauna an der kusten der Guinea-Inseln. *Z. Wiss. Zool.* **42**, 423-458.
- Haddock, S. H. D. and Case, J. F. (1999). Bioluminescence spectra of shallow and deep-sea gelatinous zooplankton: ctenophores, medusae and siphonophores. *Mar. Biol.* **133**, 571-582.
- Haddock, S. H. D., Moline, M. A. and Case, J. F. (2010). Bioluminescence in the sea. *Annu. Rev. Mar. Sci.* **2**, 443-493.
- Harvey, E. N. (1952). *Bioluminescence*. New York, NY: Academic Press.
- Hastings, J. W. and Morin, J. G. (1991). Bioluminescence. In *Neural and Integrative Animal Physiology*, Vol. 3 (ed. C. L. Prosser), pp. 131-170. New York, NY: Wiley-Liss.
- Herring, P. J. and Morin, J. G. (1978). Bioluminescence in fishes. In *Bioluminescence in Action*, pp. 273-329. New York, NY: Academic Press.
- Huber, M. E., Arneson, C. A. and Widder, E. A. (1989). Extremely blue bioluminescence in the polychaete *Polycirrus perplexus* (Terebellidae). *Bull. Mar. Sci.* **44**, 1236-1239.
- Johnsen, S. and Widder, E. A. (1998). Transparency and visibility of gelatinous zooplankton from the northwestern Atlantic and Gulf of Mexico. *Biol. Bull.* **195**, 337-348.
- Krönström, J., Karlsson, W., Johansson, B. R. and Holmgren, S. (2009). Involvement of contractile elements in control of bioluminescence in Northern krill, *Meganyctiphanes norvegica* (M. Sars). *Cell Tissue Res.* **336**, 299-308.
- Latz, M. I., Frank, T. M. and Case, J. F. (1988). Spectral composition of bioluminescence of epipelagic organisms from the Sargasso Sea. *Mar. Biol.* **98**, 441-446.
- Malaquin, A. and Carin, F. (1922). Tomopterides provenant des Campagnes de l'Hirondelle et de la Princesse-Alice 1888-1910. *Res. Camp. Sci. Prince Albert I de Monaco* **62**, 31-49.
- Martin, N. and Anctil, M. (1984). Luminescence control in the tube-worm *Chaetopterus variopedatus*: role of nerve cord and photogenic gland. *Biol. Bull.* **166**, 583-593.
- Miron, M. J., LaRivière, L., Bassot, J. M. and Anctil, M. (1987). Immunohistochemical and radioautographic evidence of monoamine-containing cells in bioluminescent elytra of the scale-worm *Harmothoe imbricata* (Polychaeta). *Cell Tissue Res.* **249**, 547-556.
- Nicol, J. A. C. (1952). Studies on *Chaetopterus variopedatus* (Renier). II. Nervous control of light production. *J. Mar. Biol. Assoc. UK* **30**, 433-452.
- Nicol, J. A. C. (1954). The nervous control of luminescent responses in polynoid worms. *J. Mar. Biol. Assoc. UK* **33**, 225-255.
- Nicol, J. A. C. (1960). The regulation of light emission in animals. *Biol. Rev. Camb. Philos. Soc.* **35**, 1-40.
- Nicolas, M.-T., Moreau, M. and Guerrier, P. (1978). Indirect nervous control of luminescence in the polynoid worm *Harmothoe lunulata*. *J. Exp. Zool.* **206**, 427-433.
- Osborn, K. J., Haddock, S. H. D. and Rouse, G. W. (2011). *Swima* (Annelida, Acrociiridae), holopelagic worms from the deep Pacific. *Zool. J. Linn. Soc.* **163**, 663-678.
- Poupin, J., Cussatlegras, A. S. and Geistdoerfer, P. (1999). *Plancton Marin Bioluminescent: Inventaire Documenté des Espèces et Bilan Des Formes Les Plus Communes de la Mer d'Iroise*, pp. 1-83. Lanvéoc-Poulmic, France: Laboratoire d'Océanographie de l'École Navale.
- Raskoff, K. A., Sommer, F. A., Hamner, W. M. and Cross, K. M. (2003). Collection and culture techniques for gelatinous zooplankton. *Biol. Bull.* **204**, 68-80.
- Ross, L. and Ross, B. (2008). *Anaesthetic and Sedative Techniques for Aquatic Animals*. Wiley-Blackwell.
- Smaldon, G. and Lee, E. W. (1979). *A Synopsis of Methods for the Narcotisation of Marine Invertebrates*. Edinburgh: Royal Scottish Museum.
- Tsuji, F. I. and Hill, E. (1983). Repetitive cycles of bioluminescence and spawning in the polychaete, *Odontosyllis phosphorea*. *Biol. Bull.* **165**, 444-449.
- Walker, R. J., Brooks, H. L. and Holden-Dye, L. (1996). Evolution and overview of classical transmitter molecules and their receptors. *Parasitology* **113** Suppl., S3-S33.
- Wilkens, L. A. and Wolken, J. J. (1981). Electroretinograms from *Odontosyllis enopla* (Polychaeta; Syllidae): initial observations on the visual system of the bioluminescent fireworm of Bermuda. *Mar. Freshw. Behav. Physiol.* **8**, 55-66.
